# Supplementary material for: Improvement of the Mass-Rearing Protocols for the South American Fruit Fly for Application of the Sterile Insect Technique
Source: MDPI journal article supplement (doi:10.3390/insects12070622), 2021-07-09
Supplement: s1 [file s1]

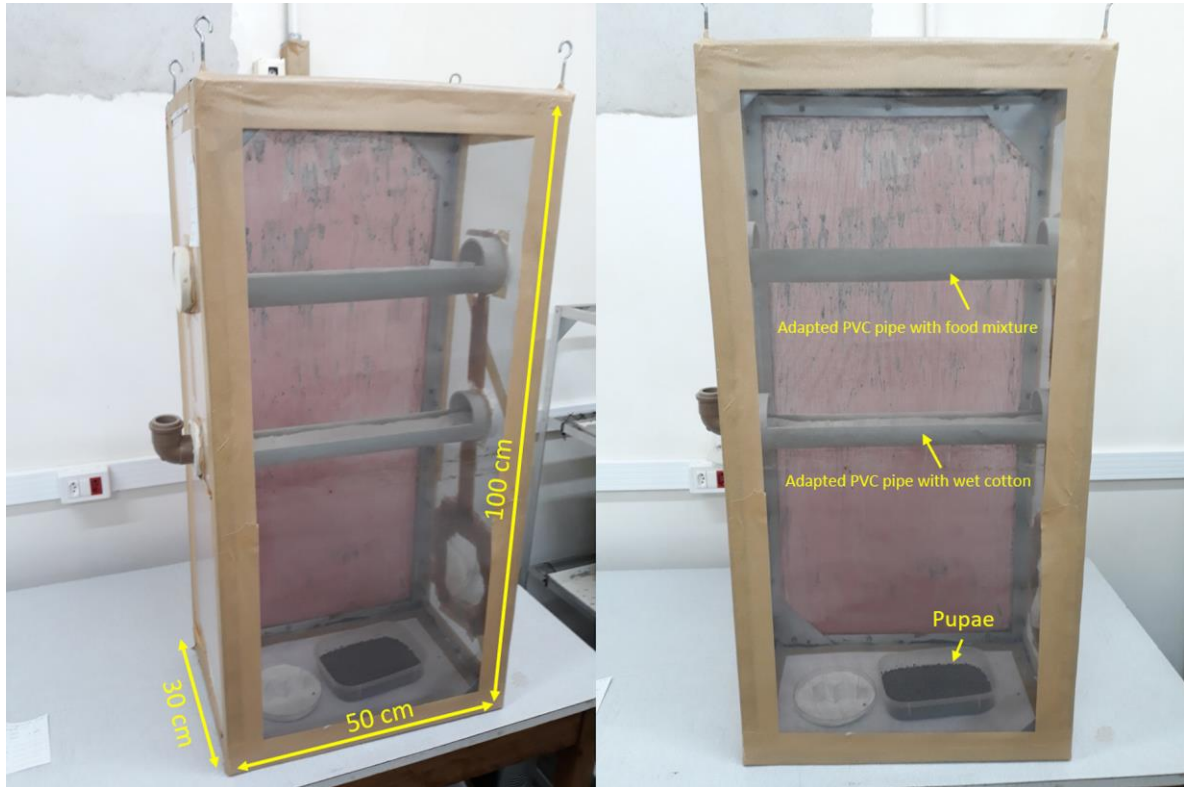

**Figure S1.** Cages used for the assessment of egg production with different adult densities. The useful area and volume for flies were 20,799.00 cm<sup>2</sup> and 148,076.75 cm<sup>3</sup>, respectively.

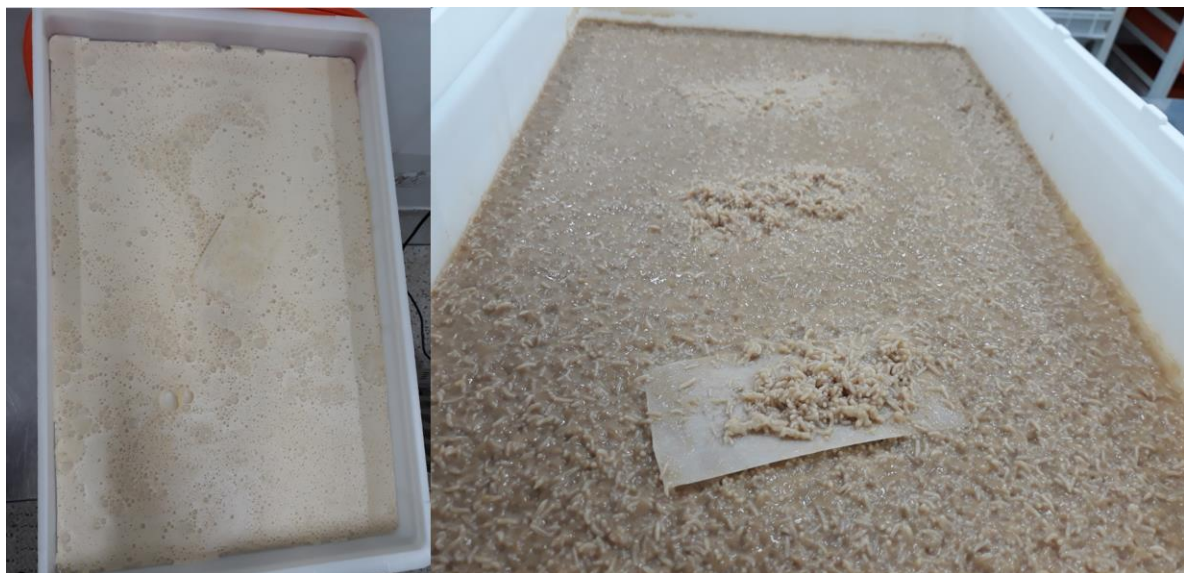

**Figure S2.** Larval diet with corn flour and carrageenan (CENA's diet) seeded with *Anastrepha fraterculus* eggs (at the left) and third instar larvae (at the right).

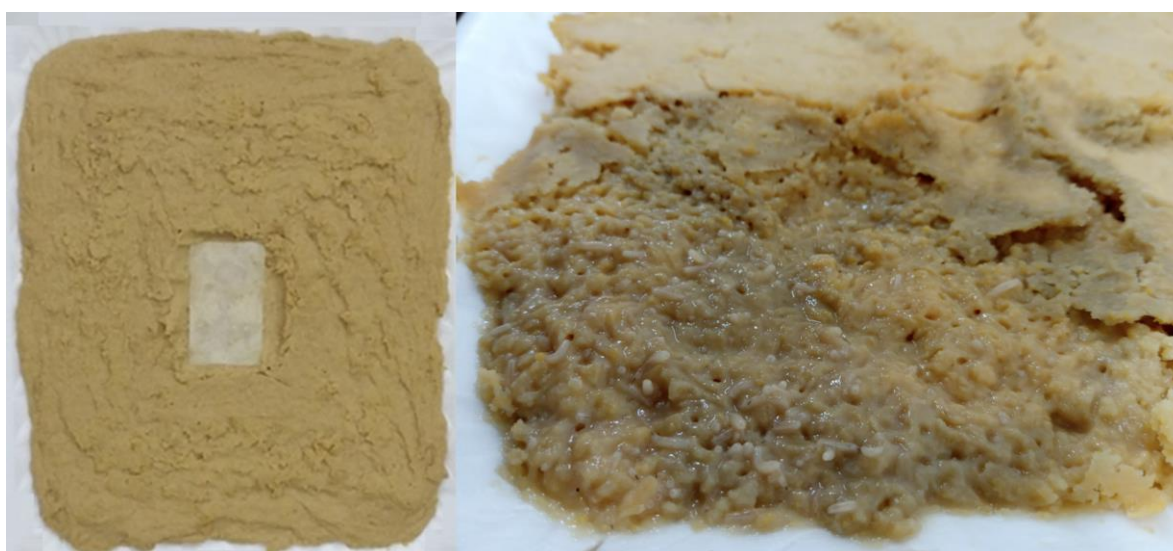

**Figure S3.** Larval diet based on corn flour (Embrapa's diet) seeded with *Anastrepha fraterculus* eggs (at the left) and appearance of the diet after larval development (at the right).

**Table S1.** Amount of ingredients and their costs to prepare 1 kg of a larval diet based on corn flour (Embrapa's diet) or corn flour and carrageenan (CENA's diet).

| INGREDIENT               | Embrapa's diet              |                          | CENA's diet                 |             |
|--------------------------|-----------------------------|--------------------------|-----------------------------|-------------|
|                          | Quantity (for 1 kg of diet) | Cost (US\$) <sup>1</sup> | Quantity (for 1 kg of diet) | Cost (US\$) |
| Yellow corn flour Yoki®  | 300 g                       | 0.28                     | 60 g                        | 0.053       |
| Carrageenan Agargel®     | ---                         | ---                      | 6 g                         | 0.17        |
| Brewer's yeast Brewcell® | 50 g                        | 0.068                    | 60 g                        | 0.080       |
| Sugar                    | 30 g                        | 0.043                    | 60 g                        | 0.089       |
| Sodium benzoate          | 2 g                         | 0.025                    | 1 g                         | 0.011       |
| Nipagin solution 0.1%    | 2 mL                        | 0.0028                   | 8 mL                        | 0.015       |
| Citric acid              | 6 g                         | 0.034                    | ---                         | ---         |
| Hydrochloric acid        | ---                         | ---                      | 4 mL                        | 0.020       |
| Water                    | 1120 mL                     | 0.00289                  | 800 mL                      | 0.002       |
| <b>Total (US\$)</b>      |                             | <b>0.46</b>              |                             | <b>0.44</b> |

<sup>1</sup> Individual cost of each ingredient = [(quantity of the ingredient for 1 kg of diet) × (US\$/kg or liter of the ingredient)] ÷ 10<sup>3</sup>. \* Ingredients to prepare 1 kg of the larval diet proposed previously by Walder et al. [17]: 60 g of wheat germ (US\$ 0.103), 3.4 g of agar (US\$ 0.20), 60 g of brewer's yeast (US\$ 0.08), 60 g of sugar (US\$ 0.089), 1 g of sodium benzoate (US\$ 0.011), 8 mL of Nipagin solution 0.1% (US\$ 0.015), 4 mL of hydrochloric acid (US\$ 0.02) and 800 mL of water (US\$ 0.002).

**Table S2.** Nutritional content of the main raw ingredients (according to suppliers' information) and their approximate contribution to larval diets from Embrapa and CENA.

| INGREDIENT               |         |                      | NUTRIENTS (g/kg)  |                     |                   |                   |                   |              |
|--------------------------|---------|----------------------|-------------------|---------------------|-------------------|-------------------|-------------------|--------------|
|                          |         |                      | Crude protein     | Total carbohydrates | Total Fat         | Fibers            | Minerals          | Vitamins     |
| Brewer's yeast Brewcell® |         |                      | 503               | not declared        | 2                 | 30                | 80                | not declared |
| Yellow corn flour Yoki®  |         |                      | 72                | 820                 | 12                | 38                | not declared      | not declared |
| Sugar Caravelas®         |         |                      | 0                 | 1,000               | 0                 | not declared      | 0                 | not declared |
| DIET                     | Embrapa | Total (g/kg)         | 46.8 <sup>1</sup> | 276.0 <sup>4</sup>  | 3.7 <sup>6</sup>  | 12.9 <sup>8</sup> | 4.0 <sup>10</sup> | unknow       |
|                          |         | % (w/w) <sup>2</sup> | 4.7               | 27.6                | 0.37              | 1.29              | 0.4               | unknow       |
|                          | CENA    | Total (g/kg)         | 34.5 <sup>3</sup> | 109.2 <sup>5</sup>  | 0.84 <sup>7</sup> | 4.08 <sup>9</sup> | 4.8 <sup>11</sup> | unknow       |
|                          |         | % (w/w)              | 3.5               | 10.92               | 0.084             | 0.41              | 0.48              | unknow       |

<sup>1</sup> Total estimated protein input (g/kg of diet) = [(503 × 50) ÷ 10<sup>3</sup>] + [(72 × 300) ÷ 10<sup>3</sup>] + 0. <sup>2</sup> Percentage of the nutrient in 1 kg of diet = (total ingredient input (g/kg) × 100) ÷ 10<sup>3</sup>. <sup>3</sup> Total estimated protein input (g/kg of diet) = [(503 × 60) ÷ 10<sup>3</sup>] + [(72 × 60) ÷ 10<sup>3</sup>] + 0. <sup>4</sup> Total estimated carbohydrate input (g/kg of diet) = 0 + [(820 × 300) ÷ 10<sup>3</sup>] + [(10<sup>3</sup> × 30) ÷ 10<sup>3</sup>]. <sup>5</sup> Total estimated carbohydrate input (g/kg of diet) = 0 + [(820 × 60) ÷ 10<sup>3</sup>] + [(10<sup>3</sup> × 60) ÷ 10<sup>3</sup>]. <sup>6</sup> Total estimated lipid input (g/kg of diet) = [(2 × 50) ÷ 10<sup>3</sup>] + [(12 × 300) ÷ 10<sup>3</sup>].

$\div 10^3] + 0$ . <sup>7</sup> Total estimated lipid input (g/kg of diet) =  $[(2 \times 60) \div 10^3] + [(12 \times 60) \div 10^3] + 0$ . <sup>8</sup> Total estimated fiber input (g/kg of diet) =  $[(30 \times 50) \div 10^3] + [(38 \times 300) \div 10^3]$ . <sup>9</sup> Total estimated fiber input (g/kg of diet) =  $[(30 \times 60) \div 10^3] + [(38 \times 60) \div 10^3]$ . <sup>10</sup> Total estimated mineral input (g/kg of diet) =  $(80 \times 50) \div 10^3$ . <sup>11</sup> Total estimated mineral input (g/kg of diet) =  $(80 \times 60) \div 10^3$ .
